# Supplementary material for: Measurement report: Source apportionment and environmental impacts of volatile organic compounds (VOCs) in Lhasa, a highland city in China
Source: Copernicus journal article supplement (doi:10.5194/acp-23-10383-2023), 2023-09-19
Supplement: Supplementary file 1 [file acp-23-10383-2023-supplement.pdf]

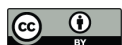

*Supplement of*

## **Measurement report: Source apportionment and environmental impacts of volatile organic compounds (VOCs) in Lhasa, a highland city in China**

**Chunxiang Ye et al.**

*Correspondence to:* Chunxiang Ye (c.ye@pku.edu.cn)

The copyright of individual parts of the supplement might differ from the article licence.

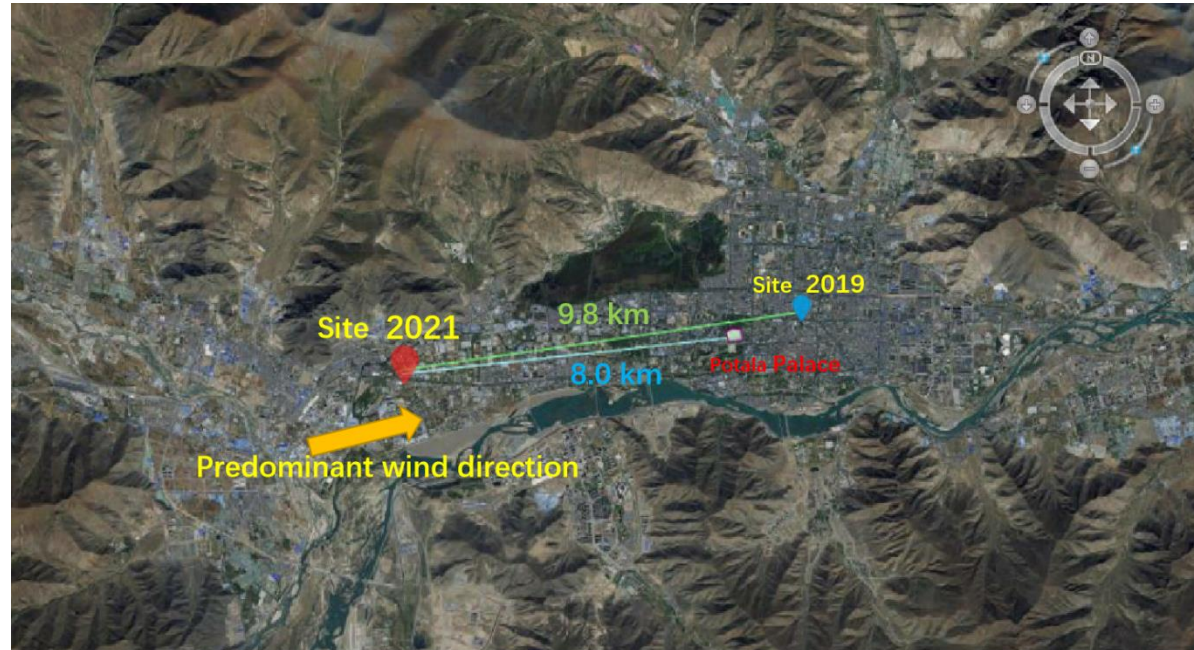

Figure S1. Measurement location in the west corner of the Lhasa city and its relative position to our previous measurement.

**Table S1 Concentration, standard deviation and sources of measured VOC species**

| Class                  | Species                | Mean/ppb | STD   | Species Number | S/N  | Sources                                          | References                |
|------------------------|------------------------|----------|-------|----------------|------|--------------------------------------------------|---------------------------|
| Alkyne                 | Acetylene              | 0.299    | 0.182 | 1              | 2.33 | Biomass burning, Coal burning, Vehicle emissions | (Liu et al., 2008)        |
| Nitrile                | Acetonitrile           | 1.112    | 1.429 | 2              | 2.00 | Biomass burning                                  | (Chen et al., 2017)       |
| Alkane                 | Ethane                 | 0.780    | 0.192 | 3              | 2.33 | Combustion, Vehicle emissions                    | (Stein and Rudolph, 2007) |
|                        | Propane                | 1.283    | 1.748 | 4              | 2.33 | Combustion, NG/LPG                               | (Liu et al., 2008)        |
|                        | Isobutane              | 0.485    | 0.578 | 5              | 2.33 | Vehicle emissions                                | (Baudic et al., 2016)     |
|                        | n-Butane               | 0.558    | 0.726 | 6              | 2.33 | Vehicle emissions                                | (Baudic et al., 2016)     |
|                        | Isopentane             | 0.314    | 0.455 | 7              | 2.30 | Gasoline evaporation, Vehicle emissions          | (Liu et al., 2008)        |
|                        | n-Pentane              | 0.127    | 0.132 | 8              | 2.28 | Gasoline evaporation, Vehicle emissions          | (Liu et al., 2008)        |
|                        | Cyclopentane           | 0.002    | 0.011 |                |      |                                                  |                           |
|                        | 2,2-Dimethylbutane     | 0.009    | 0.008 |                |      |                                                  |                           |
|                        | 2,3-Dimethylbutane     | 0.088    | 0.177 |                |      |                                                  |                           |
|                        | 2-Methylpentane        | 0.034    | 0.069 |                |      |                                                  |                           |
|                        | 3-methylpentane        | 0.044    | 0.062 |                |      |                                                  |                           |
|                        | n-Hexane               | 0.050    | 0.040 |                |      |                                                  |                           |
|                        | 2,4-Dimethylpentane    | 0.009    | 0.007 |                |      |                                                  |                           |
|                        | Methylcyclopentane     | 0.016    | 0.022 |                |      |                                                  |                           |
|                        | 2-Methylhexane         | 0.016    | 0.018 |                |      |                                                  |                           |
|                        | Cyclohexane            | 0.008    | 0.006 |                |      |                                                  |                           |
|                        | 2,3-Dimethylpentane    | 0.006    | 0.009 |                |      |                                                  |                           |
|                        | 3-Methylhexane         | 0.020    | 0.021 |                |      |                                                  |                           |
|                        | 2,2,4-Trimethylpentane | 0.014    | 0.013 |                |      |                                                  |                           |
|                        | n-Heptane              | 0.039    | 0.029 |                |      |                                                  |                           |
|                        | Methylcyclohexane      | 0.006    | 0.008 |                |      |                                                  |                           |
| 2,3,4-Trimethylpentane | 0.004                  | 0.004    |       |                |      |                                                  |                           |
| 2-methylheptane        | 0.007                  | 0.006    |       |                |      |                                                  |                           |
| 3-Methylheptane        | 0.006                  | 0.006    |       |                |      |                                                  |                           |
| Octane                 | 0.034                  | 0.030    |       |                |      |                                                  |                           |
| n-Nonane               | 0.022                  | 0.017    |       |                |      |                                                  |                           |
| n-Decane               | 0.012                  | 0.007    |       |                |      |                                                  |                           |
| Undecane               | 0.050                  | 0.146    |       |                |      |                                                  |                           |

| Class              | Species                | Mean/ppb | STD   | Species Number | S/N  | Sources                                                 | References                                        |
|--------------------|------------------------|----------|-------|----------------|------|---------------------------------------------------------|---------------------------------------------------|
| Alkene             | Ethylene               | 0.405    | 0.273 | 9              | 2.32 | Combustion, Biogenic                                    | (Baudic et al., 2016)<br>(Goldstein et al., 1996) |
|                    | Propene                | 0.219    | 0.191 | 10             | 2.31 | Combustion, Biogenic                                    | (Wang et al., 2009)<br>(Sindelarova et al., 2014) |
|                    | trans-2-Butene         | 0.029    | 0.076 | 11             | 0.75 | Vehicle emissions                                       | (Liu et al., 2008)                                |
|                    | 1-Butene               | 0.068    | 0.070 | 12             | 2.00 | Vehicle emissions                                       | (Liu et al., 2008)                                |
|                    | 1,3-Butadiene          | 0.073    | 0.100 | 13             | 2.01 | Vehicle emissions, Biomass burning                      | (Liu et al., 2008)                                |
|                    | 1-Pentene              | 0.037    | 0.033 | 14             | 1.76 | Vehicle emissions                                       | (Liu et al., 2008)                                |
|                    | trans-2-Pentene        | 0.016    | 0.026 | 15             | 1.03 | Vehicle emissions                                       | (Liu et al., 2008)                                |
|                    | Isoprene               | 0.175    | 0.255 | 16             | 2.01 | Biogenic sources                                        | (Sindelarova et al., 2014)                        |
|                    | cis-2-Butene           | 0.005    | 0.032 |                |      |                                                         |                                                   |
|                    | cis-2-Pentene          | 0.021    | 0.034 |                |      |                                                         |                                                   |
|                    | 1-Hexene               | 0.038    | 0.033 |                |      |                                                         |                                                   |
| Aromatic           | Benzene                | 0.086    | 0.061 | 17             | 2.30 | Biomass burning, Vehicle emissions, Industrial          | (Liu et al., 2008)                                |
|                    | Toluene                | 0.278    | 0.526 | 18             | 2.32 | Solvent, Biomass burning, Vehicle emissions, Industrial | (Liu et al., 2008)                                |
|                    | Ethylbenzene           | 0.075    | 0.076 | 19             | 2.26 | Solvent, Biomass burning, Vehicle emissions, Industrial | (Liu et al., 2008)                                |
|                    | m/p-Xylene             | 0.156    | 0.146 | 20             | 2.31 | Solvent, Biomass burning, Vehicle emissions, Industrial | (Liu et al., 2008)                                |
|                    | o-Xylene               | 0.158    | 0.143 | 21             | 2.31 | Solvent, Biomass burning, Vehicle emissions, Industrial | (Liu et al., 2008)                                |
|                    | Styrene                | 0.029    | 0.024 | 22             | 2.10 | Solvent, Vehicle emissions, Industrial                  | (Yuan et al., 2010)                               |
|                    | n-Propylbenzene        | 0.005    | 0.004 | 23             | 0.29 | Solvent                                                 | (Yuan et al., 2010)                               |
|                    | 3-Ethyltoluene         | 0.013    | 0.014 | 24             | 1.23 | Solvent                                                 | (Yuan et al., 2010)                               |
|                    | 4-Ethyltoluene         | 0.007    | 0.007 | 25             | 0.52 | Solvent                                                 | (Yuan et al., 2010)                               |
|                    | 1,3,5-Trimethylbenzene | 0.007    | 0.007 | 26             | 0.51 | Solvent                                                 | (Yuan et al., 2010)                               |
|                    | 2-Ethyltoluene         | 0.006    | 0.006 | 27             | 0.43 | Solvent                                                 | (Yuan et al., 2010)                               |
|                    | 1,2,4-Trimethylbenzene | 0.017    | 0.021 | 28             | 1.47 | Solvent                                                 | (Yuan et al., 2010)                               |
|                    | Isopropylbenzene       | 0.003    | 0.003 |                |      |                                                         |                                                   |
|                    | 1,2,3-Trimethylbenzene | 0.005    | 0.005 |                |      |                                                         |                                                   |
| 1,3-Diethylbenzene | 0.001                  | 0.001    |       |                |      |                                                         |                                                   |
| 1,4-Diethylbenzene | 0.003                  | 0.003    |       |                |      |                                                         |                                                   |

| Class               | Species                                                  | Mean/ppb | STD   | Species Number | S/N  | Sources                          | References                   |
|---------------------|----------------------------------------------------------|----------|-------|----------------|------|----------------------------------|------------------------------|
| Halohydrocarbon     | Chloromethane                                            | 0.900    | 0.164 | 29             | 2.33 | Biomass burning                  | (Liu et al., 2008)           |
|                     | Freon11(CCl <sub>3</sub> F)                              | 0.321    | 0.016 | 30             | 2.33 | Background compounds             | (Saeaw and Thepanondh, 2015) |
|                     | Dichloromethane                                          | 0.273    | 0.215 | 31             | 2.33 | Solvent, Industrial              | (Huang et al., 2014)         |
|                     | Chloroform                                               | 0.040    | 0.030 | 32             | 2.23 | Industrial solvents or additives | (Cai et al., 2010)           |
|                     | 1,2-Dichloroethane                                       | 0.084    | 0.074 | 33             | 2.28 | Industrial solvents or additives | (Cai et al., 2010)           |
|                     | Freon114(C <sub>2</sub> Cl <sub>2</sub> F <sub>4</sub> ) | 0.028    | 0.003 |                |      |                                  |                              |
|                     | Vinyl chloride                                           | 0.009    | 0.018 |                |      |                                  |                              |
|                     | Bromomethane                                             | 0.003    | 0.002 |                |      |                                  |                              |
|                     | Chloroethane                                             | 0.005    | 0.007 |                |      |                                  |                              |
|                     | 1,1-Dichloroethylene                                     | 0.001    | 0.001 |                |      |                                  |                              |
|                     | Freon113(C <sub>2</sub> Cl <sub>3</sub> F <sub>3</sub> ) | 0.098    | 0.004 |                |      |                                  |                              |
|                     | 1,1-Dichloroethane                                       | 0.050    | 0.129 |                |      |                                  |                              |
|                     | cis-1,2-Dichloroethylene                                 | 0.001    | 0.002 |                |      |                                  |                              |
|                     | 1,1,1-Trichloroethane                                    | 0.003    | 0.001 |                |      |                                  |                              |
|                     | Tetrachloromethane                                       | 0.110    | 0.008 |                |      |                                  |                              |
|                     | Trichloroethylene                                        | 0.002    | 0.007 |                |      |                                  |                              |
|                     | 1,2-Dichloropropane                                      | 0.038    | 0.049 |                |      |                                  |                              |
|                     | Bromodichloromethane                                     | 0.002    | 0.001 |                |      |                                  |                              |
|                     | trans-1,3-Dichloropropene                                | 0.002    | 0.003 |                |      |                                  |                              |
|                     | cis-1,3-Dichloropropene                                  | 0.000    | 0.000 |                |      |                                  |                              |
|                     | 1,1,2-Trichloroethane                                    | 0.010    | 0.014 |                |      |                                  |                              |
|                     | Tetrachloroethylene                                      | 0.010    | 0.019 |                |      |                                  |                              |
|                     | 1,2-Dibromoethane                                        | 0.000    | 0.001 |                |      |                                  |                              |
|                     | Chlorobenzene                                            | 0.002    | 0.002 |                |      |                                  |                              |
|                     | 1,3-Dichlorobenzene                                      | 0.002    | 0.001 |                |      |                                  |                              |
|                     | 1,4-Dichlorobenzene                                      | 0.002    | 0.001 |                |      |                                  |                              |
| Benzylchloride      | 0.001                                                    | 0.001    |       |                |      |                                  |                              |
| 1,2-Dichlorobenzene | 0.001                                                    | 0.001    |       |                |      |                                  |                              |

| Class     | Species                 | Mean/ppb | STD   | Species Number | S/N  | Sources                                                   | References              |
|-----------|-------------------------|----------|-------|----------------|------|-----------------------------------------------------------|-------------------------|
| OVOC      | Acetaldehyde            | 3.591    | 3.441 | 34             | 2.33 | Combustion, Vehicle emissions, Second formation           | (Baudic et al., 2016)   |
|           | Acrolein                | 0.247    | 0.154 | 35             | 2.31 | Vehicle emissions, Cooking, Second formation              | (Sha et al., 2021)      |
|           | Propanal                | 0.717    | 0.508 | 36             | 2.33 | Biomass burning, Second formation                         | (Zhang et al., 2013)    |
|           | Acetone                 | 2.530    | 0.834 | 37             | 2.33 | Solvent, Combustion, Second formation                     | (Sha et al., 2021)      |
|           | Methyl Tert-Butyl Ether | 0.099    | 0.164 | 38             | 2.22 | Gasoline vehicle emissions                                | (Zhang et al., 2013)    |
|           | Methacrolein            | 0.078    | 0.060 | 39             | 2.27 | Biogenic sources                                          | (Guenther et al., 2012) |
|           | n-Butanal               | 0.512    | 0.379 | 40             | 2.33 | Second formation                                          | (Liu et al., 2009)      |
|           | Methyl Vinyl Ketone     | 0.190    | 0.119 | 41             | 2.32 | Biogenic sources                                          | (Guenther et al., 2012) |
|           | Methyl Ethyl Ketone     | 0.346    | 0.186 | 42             | 2.33 | Second formation                                          | (Mellouki et al., 2015) |
|           | 2-Pentanone             | 0.067    | 0.056 | 43             | 2.17 | Second formation                                          | (Mellouki et al., 2015) |
|           | n-Pentanal              | 0.453    | 0.474 | 44             | 2.32 |                                                           |                         |
|           | 3-Pentanone             | 0.040    | 0.040 | 45             | 2.00 |                                                           |                         |
|           | n-Hexanal               | 0.465    | 0.505 | 46             | 2.33 |                                                           |                         |
| Inorganic | BC (ug/m <sup>3</sup> ) | 0.8      | 0.6   | 47             | 2.98 | Biomass burning, Diesel vehicle emissions                 | (Gentner et al., 2017)  |
|           | NO <sub>x</sub>         | 5.00     | 5.38  | 48             | 2.33 | Combustion, Vehicle emissions (especially diesel vehicle) | (Gentner et al., 2017)  |
|           | NO                      | 3.98     | 4.53  | 49             | 2.33 | Combustion, Vehicle emissions (especially diesel vehicle) | (Gentner et al., 2017)  |
|           | CO (ppm)                | 0.138    | 0.035 | 50             | 3.50 | Combustion, Vehicle emissions                             | (Gentner et al., 2017)  |
|           | O <sub>3</sub>          | 49.6     | 12.9  |                |      |                                                           |                         |

**Table S2 Comparison of various VOCs concentrations with other observed results in Lhasa (ppb)**

| <b>Period</b>         | <b>Latitude</b> | <b>Longitude</b> | <b>Species</b> | <b>TVOCs</b> | <b>Alkanes</b> | <b>Alkenes</b> | <b>Aromatics</b> | <b>OVOC</b> | <b>Halohydrocarbons</b> | <b>Others</b> |
|-----------------------|-----------------|------------------|----------------|--------------|----------------|----------------|------------------|-------------|-------------------------|---------------|
| 1998.6 <sup>a</sup>   | 29.67           | 91.13            | 69             | 113.5        | 24.2           | 22.9           | 55.0             | -           | -                       | 11.4          |
| 2019 <sup>b</sup>     | 29.65           | 91.14            | 107            | 49.8         | 30.5           | 4.5            | 2.5              | 5.8         | 4.5                     | 2.1           |
| 2019.05 <sup>c</sup>  | 29.65           | 91.13            | 55             | 21.5         | 12.4           | 4.5            | 4.6              | -           | -                       | -             |
| 2021.5-6 <sup>*</sup> | 29.63           | 91.02            | 98             | 18.7         | 4.0            | 1.1            | 0.9              | 9.3         | 2.0                     | 1.4           |

a.(Yu et al., 2001), b.(Yu et al., 2022), c.(Guo et al., 2022), \* This study.

## References:

- Baudic, A., Gros, V., Sauvage, S., Locoge, N., Sanchez, O., Sarda-Esteve, R., Kalogridis, C., Petit, J.-E., Bonnaire, N., Baisnee, D., Favez, O., Albinet, A., Sciare, J., and Bonsang, B.: Seasonal variability and source apportionment of volatile organic compounds (VOCs) in the Paris megacity (France), *A Atmos. Chem. Phys.*, 16, 11961–11989, <https://doi.org/10.5194/acp-16-11961-2016>, 2016.
- Cai, C., Geng, F., Tie, X., Yu, Q., and An, J.: Characteristics and source apportionment of VOCs measured in Shanghai, China, *Atmos. Environ.*, 44, 5005–5014, <https://doi.org/10.1016/j.atmosenv.2010.07.059>, 2010.
- Chen, J., Li, C., Ristovski, Z., Milic, A., Gu, Y., Islam, M. S., Wang, S., Hao, J., Zhang, H., He, C., Guo, H., Fu, H., Miljevic, B., Morawska, L., Thai, P., Lam, Y. F., Pereira, G., Ding, A., Huang, X., and Dumka, U. C.: A review of biomass burning: Emissions and impacts on air quality, health and climate in China, *Sci Total Environ.*, 579, 1000–1034, <https://doi.org/10.1016/j.scitotenv.2016.11.025>, 2017.
- Gentner, D. R., Jathar, S. H., Gordon, T. D., Bahreini, R., Day, D. A., El Haddad, I., Hayes, P. L., Pieber, S. M., Platt, S. M., de Gouw, J., Goldstein, A. H., Harley, R. A., Jimenez, J. L., Prevot, A. S. H., and Robinson, A. L.: Review of Urban Secondary Organic Aerosol Formation from Gasoline and Diesel Motor Vehicle Emissions, *Environ. Sci. Technol.*, 51, 1074–1093, <https://doi.org/10.1021/acs.est.6b04509>, 2017.
- Goldstein, A. H., Fan, S. M., Goulden, M. L., Munger, J. W., and Wofsy, S. C.: Emissions of ethene, propene, and 1-butene by a midlatitude forest, *J. Geophys. Res.: Atmos.*, 101, 9149–9157, <https://doi.org/10.1029/96JD00334>, 1996.
- Guenther, A. B., Jiang, X., Heald, C. L., Sakulyanontvittaya, T., Duhl, T., Emmons, L. K., and Wang, X.: The Model of Emissions of Gases and Aerosols from Nature version 2.1 (MEGAN2.1): an extended and updated framework for modeling biogenic emissions, *Geosci. Model Dev.*, 5, 1471–1492, <https://doi.org/10.5194/gmd-5-1471-2012>, 2012.
- Guo, S., Wang, Y., Zhang, T., Ma, Z., Ye, C., Lin, W., Yang Zong, D. J., and Yang Zong, B. M.: Volatile organic compounds in urban Lhasa: variations, sources, and potential risks, *Front. Environ. Sci.*, 10, <https://doi.org/10.3389/fenvs.2022.941100>, 2022.
- Huang, B., Lei, C., Wei, C., and Zeng, G.: Chlorinated volatile organic compounds (Cl-VOCs) in environment — sources, potential human health impacts, and current remediation technologies, *Environ. Int.*, 71, 118–138, <https://doi.org/10.1016/j.envint.2014.06.013>, 2014.
- Liu, Y., Shao, M., Fu, L., Lu, S., Zeng, L., and Tang, D.: Source profiles of volatile organic compounds (VOCs) measured in China: Part I, *Atmos. Environ.*, 42, 6247–6260, <https://doi.org/10.1016/j.atmosenv.2008.01.070>, 2008.
- Liu, Y., Shao, M., Kuster, W. C., Goldan, P. D., Li, X., Lu, S., and de Gouw, J. A.: Source identification of reactive hydrocarbons and oxygenated VOCs in the summertime in Beijing, *Environ. Sci. Technol.*, 43, 75–81, <https://doi.org/10.1021/es801716n>, 2009.
- Mellouki, A., Wallington, T. J., and Chen, J.: Atmospheric Chemistry of Oxygenated Volatile Organic Compounds: Impacts on Air Quality and Climate, *Chem. Rev.*, 115, 3984–4014, <https://doi.org/10.1021/cr500549n>, 2015.
- Saeaw, N. and Thepanondh, S.: Source apportionment analysis of airborne VOCs using positive matrix factorization in industrial and urban areas in Thailand, *Atmos. Pollut. Res.*, 6, 644–650, <https://doi.org/10.5094/apr.2015.073>, 2015.
- Sha, Q., Zhu, M., Huang, H., Wang, Y., Huang, Z., Zhang, X., Tang, M., Lu, M., Chen, C., Shi, B., Chen, Z., Wu, L., Zhong, Z., Li, C., Xu, Y., Yu, F., Jia, G., Liao, S., Cui, X., Liu, J., and Zheng, J.: A newly integrated dataset of volatile organic compounds (VOCs) source profiles and implications for the future development of VOCs profiles in China, *Sci. Total Environ.*, 793, 148348, <https://doi.org/10.1016/j.scitotenv.2021.148348>, 2021.



- Sindelarova, K., Granier, C., Bouarar, I., Guenther, A., Tilmes, S., Stavrakou, T., Müller, J. F., Kuhn, U., Stefani, P., and Knorr, W.: Global data set of biogenic VOC emissions calculated by the MEGAN model over the last 30 years, *Atmos. Chem. Phys.*, 14, 9317–9341, <https://doi.org/10.5194/acp-14-9317-2014>, 2014.
- Stein, O. and Rudolph, J.: Modeling and interpretation of stable carbon isotope ratios of ethane in global chemical transport models, *J. Geophys. Res.*, 112, D14308, <https://doi.org/10.1029/2006jd008062>, 2007.
- Wang, S., Wei, W., Li, D., Li, G., and Hao, J.: Characteristics of gaseous pollutants from biofuel-stoves in rural China, *Atmos. Environ.*, 43, 4148–4154, <https://doi.org/10.1016/j.atmosenv.2009.05.040>, 2009.
- Yu, J., Han, Y., Chen, M., Zhang, H., Chen, Y., and Liu, J.: Characteristics and Source Apportionment of Ambient VOCs in Lhasa, *Environmental Science (in Chinese)*, 43, 113–122, <https://doi.org/10.13227/jhjx.202104038>, 2022.
- Yu, X. L., Tang, J., Zhou, L. X., Xue, H. S., and Xue, X. J.: Emission Characteristics and Sources of Non-methane Hydrocarbons at Lhasa Area, *Acta Scientiae Circumstantiae (in Chinese)*, 21, 203–207, 2001.
- Yuan, B., Shao, M., Lu, S., and Wang, B.: Source profiles of volatile organic compounds associated with solvent use in Beijing, China, *Atmos. Environ.*, 44, 1919–1926, <https://doi.org/10.1016/j.atmosenv.2010.02.014>, 2010.
- Zhang, Y. S., Shao, M., Lin, Y., Luan, S. J., Mao, N., Chen, W. T., and Wang, M.: Emission inventory of carbonaceous pollutants from biomass burning in the Pearl River Delta Region, China, *Atmos. Environ.*, 76, 189–199, <https://doi.org/10.1016/j.atmosenv.2012.05.055>, 2013.
